# Supplementary material
Source: HighWire-hosted journal article supplement (https://bjsm.bmj.com/content/53/7/418)
Supplement: inline-supplementary-material-1 [file inline-supplementary-material-1.docx]

| Supplementary table ABC. Search strategies in MEDLINE, EMBASE, the Cochrane Library, and AMED. | | |
| --- | --- | --- |
| Search | Query | Items found |
| MEDLINE/PubMed | | |
| [#1](https://www.ncbi.nlm.nih.gov/pubmed/advanced) | Search (Register OR registry OR registers OR registries OR registries[mesh]) | [181773](https://www.ncbi.nlm.nih.gov/pubmed/?cmd=HistorySearch&querykey=1) |
| [#2](https://www.ncbi.nlm.nih.gov/pubmed/advanced) | Search (Sweden OR Swedish OR Denmark OR Danish OR Norway OR Norwegian OR Scandinavia OR "Nordic countries") | [715845](https://www.ncbi.nlm.nih.gov/pubmed/?cmd=HistorySearch&querykey=2) |
| [#3](https://www.ncbi.nlm.nih.gov/pubmed/advanced) | Search (Sweden[Mesh] OR Denmark[Mesh] OR Norway[Mesh] OR Scandinavian and nordic countries[Mesh]) | [174622](https://www.ncbi.nlm.nih.gov/pubmed/?cmd=HistorySearch&querykey=3) |
| [#5](https://www.ncbi.nlm.nih.gov/pubmed/advanced) | Search #2 OR #3 | [715845](https://www.ncbi.nlm.nih.gov/pubmed/?cmd=HistorySearch&querykey=5) |
| [#8](https://www.ncbi.nlm.nih.gov/pubmed/advanced) | Search (Anterior cruciate ligament OR ACL OR Posterior cruciate ligament OR PCL OR Knee ligament) | [37008](https://www.ncbi.nlm.nih.gov/pubmed/?cmd=HistorySearch&querykey=8) |
| [#9](https://www.ncbi.nlm.nih.gov/pubmed/advanced) | Search (Anterior cruciate ligament[Mesh] OR Anterior cruciate ligament injuries[Mesh] OR Anterior cruciate ligament reconstruction[Mesh] OR Posterior cruciate ligament[Mesh] OR Posterior cruciate ligament reconstruction[Mesh]) | [13647](https://www.ncbi.nlm.nih.gov/pubmed/?cmd=HistorySearch&querykey=9) |
| [#10](https://www.ncbi.nlm.nih.gov/pubmed/advanced) | Search #8 OR #9 | [37017](https://www.ncbi.nlm.nih.gov/pubmed/?cmd=HistorySearch&querykey=10) |
| [#11](https://www.ncbi.nlm.nih.gov/pubmed/advanced) | Search #1 AND #5 AND #10 | [91](https://www.ncbi.nlm.nih.gov/pubmed/?cmd=HistorySearch&querykey=11) |
| [#12](https://www.ncbi.nlm.nih.gov/pubmed/advanced) | Search #1 AND #5 AND #10 Filters: Publication date from 2004/01/01 to 2017/12/31 | [89](https://www.ncbi.nlm.nih.gov/pubmed/?cmd=HistorySearch&querykey=12) |
| [**#13**](https://www.ncbi.nlm.nih.gov/pubmed/advanced) | **Search #1 AND #5 AND #10 Filters: Publication date from 2004/01/01 to 2017/12/31; English** | [**87**](https://www.ncbi.nlm.nih.gov/pubmed/?cmd=HistorySearch&querykey=13) |
| EMABASE | | |
| #1 | exp register/ | 96674 |
| #2 | (Register or registry or Registers or Registries).af. | 242836 |
| #3 | #1 or #2 | 242836 |
| #4 | scandinavia/ or exp denmark/ or exp norway/ or exp sweden/ | 145862 |
| #5 | (Sweden or Swedish or Denmark or Danish or Norway or Norwegian or Scandinavia or Nordic countries).af. | 1282633 |
| #6 | #4 or #5 | 1282719 |
| #7 | exp knee cruciate ligament/ or exp anterior cruciate ligament/ or exp posterior cruciate ligament/ | 11574 |
| #8 | knee ligament injury/ or exp anterior cruciate ligament injury/ or exp posterior cruciate ligament injury/ | 8162 |
| #9 | knee ligament surgery/ or exp anterior cruciate ligament reconstruction/ or exp posterior cruciate ligament reconstruction/ | 6685 |
| #10 | ((Anterior adj3 cruciate adj3 ligament) or ACL or (Posterior adj3 cruciate adj3 ligament) or PCL or (Knee adj3 ligament)).ab,ti. | 33558 |
| #11 | #7 or #8 or #9 or #10 | 38243 |
| #12 | #3 and #6 and #11 | 98 |
| **#13** | **limit #12 to (english language and yr="2004 -Current")** | **93** |
| The Cochrane Library | | |
| #1 | MeSH descriptor: [Registries] explode all trees | 983 |
| #2 | Register or registry or Registers or Registries:ti,ab,kw (Word variations have been searched) | 32780 |
| #3 | #1 or #2 | 32819 |
| #4 | MeSH descriptor: [Scandinavian and Nordic Countries] explode all trees | 5056 |
| #5 | Sweden or Swedish or Denmark or Danish or Norway or Norwegian or Scandinavia or "Nordic countries":ti,ab,kw (Word variations have been searched) | 12070 |
| #6 | #4 or #5 | 13044 |
| #7 | MeSH descriptor: [Anterior Cruciate Ligament] explode all trees | 829 |
| #8 | MeSH descriptor: [Anterior Cruciate Ligament Reconstruction] explode all trees | 316 |
| #9 | MeSH descriptor: [Posterior Cruciate Ligament] explode all trees | 88 |
| #10 | (Anterior near/3 cruciate near/3 ligament) or ACL or (Posterior near/3 cruciate near/3 ligament) or PCL or (Knee near/3 ligament):ti,ab,kw (Word variations have been searched) | 2298 |
| #11 | #7 or #8 or #9 or #10 | 2300 |
| **#12** | **#3 and #6 and #11** | **3** |
| AMED | | |
| #1 | (DE "REGISTRIES") | 76 |
| #2 | Register OR registry OR Registers OR Registries | 940 |
| #3 | #1 OR #2 | 940 |
| #4 | Sweden OR Swedish OR Denmark OR Danish OR Norway OR Norwegian OR Scandinavia OR "Nordic countries" | 2,173 |
| #5 | (DE "ANTERIOR CRUCIATE LIGAMENT") OR (DE "ANTERIOR CRUCIATE LIGAMENT RECONSTRUCTION") | 1,429 |
| #6 | (DE "POSTERIOR CRUCIATE LIGAMENT") | 116 |
| #7 | TI ( (Anterior N3 cruciate N3 ligament) OR ACL OR (Posterior N3 cruciate N3 ligament) OR PCL OR (Knee N3 ligament) ) OR AB ( (Anterior N3 cruciate N3 ligament) OR ACL OR (Posterior N3 cruciate N3 ligament) OR PCL OR (Knee N3 ligament) ) | 1,918 |
| #8 | #5 OR #6 OR #7 | 2,037 |
| **#9** | **#3 AND #4 AND #8** | **1** |
